# Supplementary material for: Genomic Characteristion of Opportunistic Pathogen Kluyvera Reveals a Novel CTX-M Subgroup
Source: MDPI journal article supplement (doi:10.3390/microorganisms11122836), 2023-11-22
Supplement: s1 [file s1]

# Genomic Characterisation of Opportunistic Pathogen *Kluyvera* Reveals a Novel CTX-M Subgroup

Keyi Yu <sup>1</sup>, Zhenzhou Huang <sup>2</sup>, Ruiting Lan <sup>3</sup>, J. Glenn Morris, Jr. <sup>4</sup>, Yue Xiao <sup>1</sup>, Songzhe Fu <sup>5</sup>, He Gao <sup>1</sup>, Xuemei Bai <sup>1</sup>, Kun Li <sup>1</sup> and Duochun Wang <sup>1,\*</sup>

<sup>1</sup> National Institute for Communicable Disease Control and Prevention, Chinese Center for Disease Control and Prevention (China CDC), State Key Laboratory of Infectious Disease Prevention and Control, Beijing 102206, China; yky0414@163.com (K.Y.); xiaoyue@icdc.cn (Y.X.); gaohe@icdc.cn (H.G.); baixuemei@icdc.cn (X.B.); lukeleego@hotmail.com (K.L.)

<sup>2</sup> Hangzhou Center for Disease Control and Prevention, Hangzhou 310021, China; ronnie\_0414@163.com

<sup>3</sup> School of Biotechnology and Biomolecular Sciences, University of New South Wales, Sydney, NSW 2052, Australia; r.lan@unsw.edu.au

<sup>4</sup> Emerging Pathogens Institute, University of Florida, Gainesville, FL 32610, USA; jgmorris@epi.ufl.edu

<sup>5</sup> College of Marine Science and Environment, Dalian Ocean University, Dalian 116023, China; fusongzhe@dlou.edu.cn

\* Correspondence: wangduochun@icdc.cn

**Table S1** The detail information of strains used in this study

| No. | Strain          | Sequence size (Mb) | GC content (%) | BioSample    | geographic location      | host         | isolation time | isolation source                         | Species labelled (Originally identified) | Precise species           |
|-----|-----------------|--------------------|----------------|--------------|--------------------------|--------------|----------------|------------------------------------------|------------------------------------------|---------------------------|
| 1   | 220             | 5.1                | 54.2           | SAMN16845431 | Argentina: Buenos Aires  | Homo sapiens | 1998           | peritoneal fluid                         | <i>Kluyvera ascorbata</i>                | <i>Kluyvera ascorbata</i> |
| 2   | 280             | 4.90               | 54.3           | SAMN16845432 | Japan: Tokio             | environment  | 1956           | Sewage                                   | <i>Kluyvera ascorbata</i>                | <i>Kluyvera ascorbata</i> |
| 3   | 3162            | 4.98               | 54.3           | SAMN16845433 | USA: SENTRY              | Homo sapiens | -              | sepsis                                   | <i>Kluyvera ascorbata</i>                | <i>Kluyvera ascorbata</i> |
| 4   | 4663            | 4.88               | 54.2           | SAMN16845434 | USA: Charlottesville, VA | Homo sapiens | 2004           | sepsis                                   | <i>Kluyvera ascorbata</i>                | <i>Kluyvera ascorbata</i> |
| 5   | 58              | 5.02               | 54.1           | SAMN16845429 | Argentina: Buenos Aires  | Homo sapiens | 2014           | bile from acute cholecystitis            | <i>Kluyvera ascorbata</i>                | <i>Kluyvera ascorbata</i> |
| 6   | 68              | 4.91               | 54.3           | SAMN16845430 | Argentina: Buenos Aires  | Homo sapiens | 1995           | sputum                                   | <i>Kluyvera ascorbata</i>                | <i>Kluyvera ascorbata</i> |
| 7   | 711             | 4.73               | 54.4           | SAMN16845443 | USA: Burlington, VA      | Homo sapiens | 1999           | skin infection and soft tissues, abscess | <i>Kluyvera ascorbata</i>                | <i>Kluyvera ascorbata</i> |
| 8   | 8633            | 5.06               | 54.2           | SAMN16845435 | USA: Burlington, MA      | Homo sapiens | 1999           | sepsis                                   | <i>Kluyvera ascorbata</i>                | <i>Kluyvera ascorbata</i> |
| 9   | ATCC 33433      | 4.93               | 54.3           | SAMN02743264 | USA:North Carolina       | Homo sapiens | -              | human sputum                             | <i>Kluyvera ascorbata</i>                | <i>Kluyvera ascorbata</i> |
| 10  | FDA-CDC-AR_0144 | 4.98               | 54.1           | SAMN04014985 | -                        | -            | -              | -                                        | <i>Kluyvera ascorbata</i>                | <i>Kluyvera ascorbata</i> |

|    |                          |      |      |                |                               |                 |      |                                                        |                              |                                  |
|----|--------------------------|------|------|----------------|-------------------------------|-----------------|------|--------------------------------------------------------|------------------------------|----------------------------------|
| 11 | LFC                      | 4.92 | 54.2 | SAMN16845437   | Argentina:<br>Buenos<br>Aires | Homo<br>sapiens | 2014 | lower<br>urinary tract<br>infection                    | <i>Kluyvera ascorbata</i>    | <i>Kluyvera ascorbata</i>        |
| 12 | NCTC973<br>7             | 5.13 | 54.1 | SAMEA103980416 | Uruguay:<br>Montevide<br>o    | Homo<br>sapiens | -    | urine                                                  | <i>Kluyvera ascorbata</i>    | <i>Kluyvera ascorbata</i>        |
| 13 | oral taxon<br>865. F0526 | 5.25 | 54.2 | SAMN00691209   | -                             | -               | -    | -                                                      | <i>Kluyvera ascorbata</i>    | <i>Kluyvera ascorbata</i>        |
| 14 | OT2                      | 5.37 | 53.9 | SAMN10265530   | Brazil:Porto<br>Alegre        | Homo<br>sapiens | 2016 | abdominal<br>collection                                | <i>Kluyvera ascorbata</i>    | <i>Kluyvera ascorbata</i>        |
| 15 | TP1631                   | 5.37 | 54.0 | SAMD00204448   | Japan                         | -               | 2017 | -                                                      | <i>Kluyvera ascorbata</i>    | <i>Kluyvera ascorbata</i>        |
| 16 | 131SC8                   | 5.47 | 53.7 | SAMEA104032393 | Spain                         | environ<br>ment | 2013 | Sewage                                                 | <i>Kluyvera ascorbata</i>    | <i>Kluyvera ascorbata</i>        |
| 17 | 121SC68                  | 5.18 | 53.7 | SAMEA104032383 | Spain                         | environ<br>ment | 2012 | Sewage                                                 | <i>Kluyvera cryocrescens</i> | <i>Kluyvera<br/>cryocrescens</i> |
| 18 | 1919                     | 4.97 | 53.7 | SAMN16845439   | USA: San<br>Francisco,<br>CA  | Homo<br>sapiens | 2002 | sputum<br>(lower<br>respiratory<br>tract<br>infection) | <i>Kluyvera cryocrescens</i> | <i>Kluyvera<br/>cryocrescens</i> |
| 19 | 4701                     | 4.80 | 54.0 | SAMN16845440   | USA:<br>Milwaukee,<br>WI      | Homo<br>sapiens | 2002 | sepsis from<br>intravenous<br>catheter                 | <i>Kluyvera cryocrescens</i> | <i>Kluyvera<br/>cryocrescens</i> |
| 20 | 88CZ1                    | 5.23 | 53.6 | SAMEA104032394 | Spain                         | environ<br>ment | 2011 | Sewage                                                 | <i>Kluyvera cryocrescens</i> | <i>Kluyvera<br/>cryocrescens</i> |
| 21 | NBRC<br>102467           | 5.04 | 53.9 | SAMD00046725   | -                             | food            | 2006 | gulf                                                   | <i>Kluyvera cryocrescens</i> | <i>Kluyvera<br/>cryocrescens</i> |
| 22 | NCTC104<br>83            | 4.82 | 54.0 | SAMEA103924398 | Japan:<br>Tokyo               | -               | -    | -                                                      | <i>Kluyvera cryocrescens</i> | <i>Kluyvera<br/>cryocrescens</i> |
| 23 | NCTC129<br>93            | 5.29 | 53.8 | SAMEA2580319   | -                             | -               | -    | -                                                      | <i>Kluyvera cryocrescens</i> | <i>Kluyvera<br/>cryocrescens</i> |
| 24 | SCW13                    | 5.44 | 53.4 | SAMN12268149   | China:Sichu<br>an             | environ<br>ment | 2019 | hospital<br>sewage                                     | <i>Kluyvera cryocrescens</i> | <i>Kluyvera<br/>cryocrescens</i> |

|    |                             |      |      |              |                               |                 |      |                    |                              |                                  |
|----|-----------------------------|------|------|--------------|-------------------------------|-----------------|------|--------------------|------------------------------|----------------------------------|
| 25 | 14751                       | 5.00 | 55.1 | SAMN16845442 | USA:<br>Louisville,<br>KY     | Homo<br>sapiens | 2002 | sepsis             | <i>Kluyvera georgiana</i>    | <i>Kluyvera georgiana</i>        |
| 26 | ATCC<br>51603               | 5.07 | 54.5 | SAMN04875430 | -                             | Homo<br>sapiens | -    | sputum             | <i>Kluyvera georgiana</i>    | <i>Kluyvera georgiana</i>        |
| 27 | DRR01559<br>1               | 5.07 | 54.5 | SAMD00012204 | -                             | -               | -    | -                  | <i>Kluyvera georgiana</i>    | <i>Kluyvera georgiana</i>        |
| 28 | WCH1410                     | 4.99 | 54.8 | SAMN04482606 | China:<br>Chengdu             | environ<br>ment | 2015 | hospital<br>sewage | <i>Kluyvera ascorbata</i>    | <i>Kluyvera georgiana</i>        |
| 29 | DRR01558<br>7               | 4.73 | 52.6 | SAMD00004643 | -                             | -               | -    | -                  | <i>Kluyvera intermedia</i>   | <i>Kluyvera<br/>intermedia</i>   |
| 30 | DRR01571<br>2               | 4.66 | 52.6 | SAMD00011660 | -                             | -               | -    | -                  | <i>Kluyvera intermedia</i>   | <i>Kluyvera<br/>intermedia</i>   |
| 31 | HR2                         | 4.94 | 52.3 | SAMN13135960 | China:Gua<br>ngzhou           | environ<br>ment | 2017 | flower             | <i>Kluyvera intermedia</i>   | <i>Kluyvera<br/>intermedia</i>   |
| 32 | N2-1                        | 4.94 | 52.3 | SAMN13135738 | China:Gua<br>ngzhou           | environ<br>ment | 2017 | flower shop        | <i>Kluyvera intermedia</i>   | <i>Kluyvera<br/>intermedia</i>   |
| 33 | NBRC<br>102594              | 4.64 | 52.6 | SAMD00046734 | France                        | environ<br>ment | 2006 | Surface water      | <i>Kluyvera intermedia</i>   | <i>Kluyvera<br/>intermedia</i>   |
| 34 | NCTC121<br>25               | 4.74 | 52.6 | SAMEA2612496 | -                             | -               | -    | -                  | <i>Kluyvera intermedia</i>   | <i>Kluyvera<br/>intermedia</i>   |
| 35 | VRES0055<br>-sc-<br>2201594 | 5.15 | 52.0 | SAMEA3181512 | -                             | -               | -    | -                  | <i>Kluyvera intermedia</i>   | <i>Kluyvera<br/>intermedia</i>   |
| 36 | 090646                      | 5.48 | 54.5 | SAMN14563383 | China:<br>Chengdu,<br>Sichuan | environ<br>ment | 2019 | hospital<br>sewage | <i>Kluyvera sichuanensis</i> | <i>Kluyvera<br/>sichuanensis</i> |
| 37 | 13608                       | 5.03 | 54.9 | SAMN16845436 | USA:<br>Lexington,<br>KY      | Homo<br>sapiens | 2003 | sepsis             | <i>Kluyvera sichuanensis</i> | <i>Kluyvera<br/>sichuanensis</i> |
| 38 | CHPC<br>1.251*              | 4.85 | 54.9 | -            | China:<br>Beijing             | Homo<br>sapiens | 2007 | faeces             | -                            | <i>Kluyvera excreta</i>          |

|    |                         |      |      |              |                             |                 |      |                              |                              |                                  |
|----|-------------------------|------|------|--------------|-----------------------------|-----------------|------|------------------------------|------------------------------|----------------------------------|
| 39 | CHPC<br>1.254*          | 5.07 | 54.8 | -            | China:<br>Beijing           | Homo<br>sapiens | 2007 | faeces                       | -                            | <i>Kluyvera<br/>sichuanensis</i> |
| 40 | CHPC<br>1.2972*         | 4.92 | 55.0 | -            | China:<br>Beijing           | environ<br>ment | 2016 | egg surface                  | -                            | <i>Kluyvera<br/>chilikensis</i>  |
| 41 | Colony413               | 2.37 | 55.1 | SAMN17914377 | Thailand                    | -               | -    | food                         | <i>Kluyvera ascorbata</i>    | <i>Kluyvera</i> sp.              |
| 42 | L2                      | 4.74 | 53.4 | SAMN03008042 | Malaysia                    | Food            | 2013 | lettuce                      | <i>Kluyvera cryocrescens</i> | <i>Kluyvera</i><br>genomosp. 1   |
| 43 | CHPC<br>1.982*          | 4.96 | 55.5 |              | China:<br>Beijing           | Homo<br>sapiens | 2008 | faeces                       | -                            | <i>Kluyvera</i><br>genomosp. 2   |
| 44 | KA1                     | 5.28 | 55.2 | SAMN14640326 | Spain                       | Homo<br>sapiens | 2014 | Human gut                    | <i>Kluyvera ascorbata</i>    | <i>Kluyvera</i><br>genomosp. 2   |
| 45 | KA2                     | 5.26 | 55.2 | SAMN08578632 | Spain                       | Homo<br>sapiens | 2014 | Rectal<br>colonization       | <i>Kluyvera ascorbata</i>    | <i>Kluyvera</i><br>genomosp. 2   |
| 46 | KA5                     | 5.30 | 55.2 | SAMN14640327 | Spain                       | Homo<br>sapiens | 2014 | Human gut                    | <i>Kluyvera ascorbata</i>    | <i>Kluyvera</i><br>genomosp. 2   |
| 47 | MGYG-<br>HGUT-<br>02491 | 5.26 | 55.2 | SAMEA5851996 | Spain                       | Homo<br>sapiens | -    | human gut                    | <i>Kluyvera ascorbata</i>    | <i>Kluyvera</i><br>genomosp. 2   |
| 48 | R10                     | 5.26 | 55.2 | SAMN14640329 | Spain                       | Homo<br>sapiens | 2014 | Human gut                    | <i>Kluyvera ascorbata</i>    | <i>Kluyvera</i><br>genomosp. 2   |
| 49 | WP4-W19-<br>ESBL-05     | 5.16 | 55.1 | SAMD00194492 | Japan:Tokyo                 | environ<br>ment | 2019 | wastewater                   | <i>Kluyvera georgiana</i>    | <i>Kluyvera</i><br>genomosp. 2   |
| 50 | WP4-W19-<br>ESBL-10     | 5.44 | 54.8 | SAMD00194497 | Japan:Tokyo                 | environ<br>ment | 2019 | wastewater                   | <i>Kluyvera georgiana</i>    | <i>Kluyvera</i><br>genomosp. 2   |
| 51 | WP8-W19-<br>ESBL-13     | 4.95 | 55.1 | SAMD00194654 | Japan:Tokyo                 | environ<br>ment | 2019 | wastewater                   | <i>Kluyvera georgiana</i>    | <i>Kluyvera</i><br>genomosp. 2   |
| 52 | WP8-W19-<br>ESBL-15     | 4.94 | 55.3 | SAMD00194656 | Japan:Tokyo                 | environ<br>ment | 2019 | wastewater                   | <i>Kluyvera georgiana</i>    | <i>Kluyvera</i><br>genomosp. 2   |
| 53 | CRP                     | 5.16 | 54.8 | SAMN21013960 | Hong<br>Kong:<br>Ocean Park | environ<br>ment | 2018 | Ailurus<br>fulgens<br>faeces | <i>Kluyvera</i> sp.          | <i>Kluyvera</i><br>genomosp. 3   |
| 54 | ERR37129<br>46          | 5.08 | 54.7 | SAMEA6368553 | Netherlands                 | -               | -    | -                            | <i>Kluyvera georgiana</i>    | <i>Kluyvera</i><br>genomosp. 3   |

|                                                       |                                                      |      |      |                |                               |                 |      |                                               |                              |                                |
|-------------------------------------------------------|------------------------------------------------------|------|------|----------------|-------------------------------|-----------------|------|-----------------------------------------------|------------------------------|--------------------------------|
| 55                                                    | PO2S7                                                | 5.00 | 54.9 | SAMN13951572   | India:Mani<br>pur             | environ<br>ment | 2018 | Oryza sativa                                  | <i>Kluyvera genomosp. 3</i>  | <i>Kluyvera</i><br>genomosp. 3 |
| 56                                                    | YDC799                                               | 5.00 | 55.0 | SAMN07267279   | USA:<br>Pittsburgh,<br>PA     | Homo<br>sapiens | 2017 | -                                             | <i>Kluyvera georgiana</i>    | <i>Kluyvera</i><br>genomosp. 3 |
| 57                                                    | D51-sc-<br>1712206                                   | 4.80 | 52.9 | SAMEA2393042   | -                             | -               | -    | -                                             | <i>Kluyvera cryocrescens</i> | <i>Kluyvera</i><br>genomosp. 4 |
| 58                                                    | e02842a0-<br>063f-11e6-<br>bb80-<br>3c4a9275d<br>6c8 | 4.76 | 52.8 | SAMEA104428612 | -                             | Homo<br>sapiens | -    | gut                                           | <i>Kluyvera cryocrescens</i> | <i>Kluyvera</i><br>genomosp. 4 |
| 59                                                    | 169                                                  | 5.20 | 53.3 | SAMN16845438   | Argentina:<br>Buenos<br>Aires | Homo<br>sapiens | 2003 | Human,<br>lower<br>urinary tract<br>infection | <i>Kluyvera sp.</i>          | <i>Kluyvera</i><br>genomosp. 5 |
| 60                                                    | RHBSTW-<br>00307                                     | 5.23 | 53.4 | SAMN16088452   | United<br>Kingdom             | environ<br>ment | 2017 | wastewater<br>influent                        | <i>Kluyvera cryocrescens</i> | <i>Kluyvera</i><br>genomosp. 5 |
| Note: Strains labeled in dark blue are misidentified. |                                                      |      |      |                |                               |                 |      |                                               |                              |                                |

**Table S2** Primer sequence information used in this study

| Strain      | Primer                         | Enzyme digestion sites | Sequence (5'-3')                     | Target sequence (bp) |
|-------------|--------------------------------|------------------------|--------------------------------------|----------------------|
| CHPC 1.251  | KLUS <sub>CHPC 1.251</sub> -F  | <i>XbaI</i>            | GCTCTAGAATGATGACCCTGGGCGTTCG         | 873                  |
|             | KLUS <sub>CHPC 1.251</sub> -R  | <i>HindIII</i>         | CCCAAGCTTCTAAAGCCCTTCGGTAACGATTTTGC  |                      |
| CHPC 1.2972 | KLUS <sub>CHPC 1.2972</sub> -F | <i>XbaI</i>            | GCTCTAGAATGATGACCCTGGGCGTTCG         | 873                  |
|             | KLUS <sub>CHPC 1.2972</sub> -R | <i>HindIII</i>         | CCCAAGCTTCTAAAGCCCTTCGGTAACGATTTTGGC |                      |
| CHPC 1.254  | KLUS <sub>CHPC 1.254</sub> -F  | <i>XbaI</i>            | GCTCTAGAATGATGACCCTGGGCGTTCG         | 873                  |
|             | KLUS <sub>CHPC 1.254</sub> -R  | <i>HindIII</i>         | CCCAAGCTTCTAAAGCCCTTGGGTAACGATTTTGC  |                      |

**Table S3** Phenotypic characteristics of *K. sichuanensis* 090646<sup>T</sup>, *K. excreta* CHPC 1.251<sup>T</sup> and *K. chilikensis* CHPC 1.2972<sup>T</sup>

| Characteristic                    | <i>K. sichuanensis</i><br>090646 <sup>T</sup> | <i>K. excreta</i><br>CHPC<br>1.251 <sup>T</sup> | <i>K. chilikensis</i><br>CHPC 1.2972 <sup>T</sup> |
|-----------------------------------|-----------------------------------------------|-------------------------------------------------|---------------------------------------------------|
| Motility                          | +                                             | +                                               | +                                                 |
| Indole production*                | –                                             | +                                               | +                                                 |
| Voges–Proskauer<br>reaction       | –                                             | –                                               | –                                                 |
| Citrate utilization               | +                                             | +                                               | +                                                 |
| H <sub>2</sub> S production       | –                                             | –                                               | –                                                 |
| Malonate utilization              | +                                             | +                                               | +                                                 |
| NO <sub>3</sub> ->NO <sub>2</sub> | +                                             | +                                               | +                                                 |
| ONPG test                         | –                                             | –                                               | –                                                 |
| Oxidase                           | –                                             | –                                               | –                                                 |
| Catalase                          | –                                             | –                                               | –                                                 |
| Lipase                            | –                                             | –                                               | –                                                 |
| Sorbitol fermentation*            | +                                             | –                                               | –                                                 |
| β-D-Glucosidase (ESC)             | +                                             | +                                               | +                                                 |
| β-galactosidase (PNPG)            | +                                             | +                                               | +                                                 |
| Urease                            | –                                             | –                                               | –                                                 |
| Lysine decarboxylase              | +                                             | +                                               | +                                                 |
| Arginine dihydrolase              | –                                             | –                                               | –                                                 |
| Ornithine decarboxylase           | +                                             | +                                               | +                                                 |
| Gelatinase (GEL)                  | –                                             | –                                               | –                                                 |
| <b>Acid production from:</b>      |                                               |                                                 |                                                   |
| D-glucose                         | +                                             | +                                               | +                                                 |
| Sucrose*                          | –                                             | +                                               | +                                                 |
| Dulcitol                          | –                                             | –                                               | –                                                 |
| D-sorbitol                        | +                                             | +                                               | +                                                 |
| Amygdalin                         | +                                             | +                                               | +                                                 |
| Glycerol                          | –                                             | –                                               | –                                                 |
| D-mannose                         | –                                             | –                                               | –                                                 |



|                                    |   |   |   |
|------------------------------------|---|---|---|
| D-galactose                        | + | + | + |
| Esculin                            | + | + | + |
| methyl $\alpha$ -D-glucopyranoside | + | + | + |
| <b>Assimilation of:</b>            |   |   |   |
| Glucose                            | + | + | + |
| Arabinose (ARA)                    | + | + | + |
| D-Mannose (MNE)                    | + | + | + |
| D-Mannitol (MAN)                   | + | + | + |
| N-Acetyl-D-glucosamine (NAG)       | + | + | + |
| Maltose (MAL)                      | + | + | + |
| Gluconate (GNT)                    | + | + | + |
| Mannitol                           | + | + | + |
| $\alpha$ -Glucosidase*             | - | - | + |

---

Note: The biochemical reactions marked with “\*” are the differential biochemical indicators of the three species.



**Table S4** The results of antibiotic susceptibility testing.

|              | AMI | AMP | A/S2 | AZM | AZT   | CTX   | FOX | CAZ   | CAP | CIP    | CT  | ETP   | IPM   | MEM   | NA | NIT | S  | TET | TGC   | SXT      | CAZ-NXL |
|--------------|-----|-----|------|-----|-------|-------|-----|-------|-----|--------|-----|-------|-------|-------|----|-----|----|-----|-------|----------|---------|
| CHP C 1.251  | ≤4  | 8   | 2/1  | 16  | ≤0.25 | ≤0.25 | ≤2  | ≤0.25 | ≤4  | ≤0.015 | 0.5 | ≤0.25 | ≤0.25 | ≤0.12 | ≤4 | ≤3  | 8  | 2   | ≤0.25 | ≤0.5/9.5 | ≤0.25/4 |
| CHP C 1.254  | ≤4  | 8   | 2/1  | 32  | ≤0.25 | ≤0.25 | ≤2  | ≤0.25 | ≤4  | ≤0.015 | 0.5 | ≤0.25 | ≤0.25 | ≤0.12 | ≤4 | ≤3  | 8  | 2   | ≤0.25 | ≤0.5/9.5 | ≤0.25/4 |
| CHP C 1.2972 | ≤4  | 16  | 2/1  | 32  | ≤0.25 | ≤0.25 | ≤2  | ≤0.25 | ≤4  | ≤0.015 | 0.5 | ≤0.25 | ≤0.25 | ≤0.12 | ≤4 | ≤3  | 8  | 2   | ≤0.25 | ≤0.5/9.5 | ≤0.25/4 |
| CHP C 1.982  | ≤4  | ≤2  | 2/1  | 16  | ≤0.25 | ≤0.25 | ≤2  | ≤0.25 | ≤4  | ≤0.015 | 0.5 | ≤0.25 | 0.5   | ≤0.12 | ≤4 | ≤3  | <2 | ≤1  | ≤0.25 | ≤0.5/9.5 | ≤0.25/4 |

Note: Amikacin: AMI; Ampicillin: AMP; Ampicillin-Sulbactam: A/S2; Azithromycin: AZM; Aztreonam: AZT; Cefotaxime: CTX; Cefoxitin: FOX; Ceftazidime: CAZ; Chloramphenicol: CAP; Ciprofloxacin: CIP; Colistin: CT; Ertapenem: ETP; Imipenem: IPM; Meropenem: MEM; Nalidixic Acid: NA; Nitrofurantoin: NIT; Streptomycin: S; Tetracycline: TET; Tigecycline: TGC; Trimethoprim-Sulfamethoxazole: SXT; ceftazidime-avibactam: CAZ-NXL
